# Supplementary material for: Hydrothermal synthesis and thermoelectric transport property of PbS–PbTe core–shell heterostructures
Source: Royal Society of Chemistry journal article supplement (doi:10.1039/c2nj40588a), 2012-01-01
Supplement: c2nj40588a.pdf [file c2nj40588a.pdf]

## Hydrothermal synthesis and thermoelectric transport property of PbS/PbTe core-shell heterostructure†

Rencheng Jin, Gang Chen,\* Jian Pei, and Chunshuang Yan

Table S1 Summary of the thermoelectric properties obtained under various conditions.

| Molar ratio of PbS to Te precursor, R | Temperature e (K) | Electrical conductivity (S/cm) | Seebeck coefficient ( $\mu\text{V/K}$ ) | Power factor ( $\mu\text{W/mK}^2$ ) |
|---------------------------------------|-------------------|--------------------------------|-----------------------------------------|-------------------------------------|
| $\infty$ (Te=0)                       | 300               | 0.425                          | 412                                     | 7.12                                |
| $\infty$ (Te=0)                       | 600               | 3.132                          | 100                                     | 3.12                                |
| 25                                    | 300               | 1.011                          | 352                                     | 12.53                               |
| 25                                    | 600               | 17.385                         | 301                                     | 157.5                               |
| 20                                    | 300               | 1.109                          | 318                                     | 11.21                               |
| 20                                    | 600               | 24.020                         | 350                                     | 294.24                              |
| 10                                    | 300               | 1.242                          | 308                                     | 11.78                               |
| 10                                    | 600               | 26.789                         | 219                                     | 128.48                              |
| 5                                     | 300               | 1.578                          | 307                                     | 14.87                               |
| 5                                     | 600               | 28.535                         | 218                                     | 135.61                              |
| 2.5                                   | 300               | 1.794                          | 308                                     | 17.02                               |
| 2.5                                   | 600               | 35.132                         | 158                                     | 87.71                               |
| Mixed PbS/PbTe (molar ratio=20)       | 300               | 0.625                          | 382                                     | 9.12                                |
| Mixed PbS/PbTe (molar ratio=20)       | 600               | 5.122                          | 216                                     | 23.90                               |

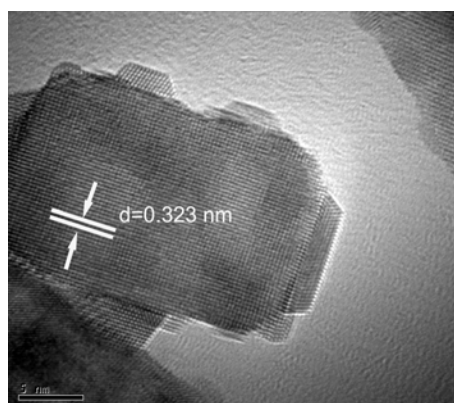

Fig. S1 The magnified HRTEM image of the single rectangular nanoparticle.

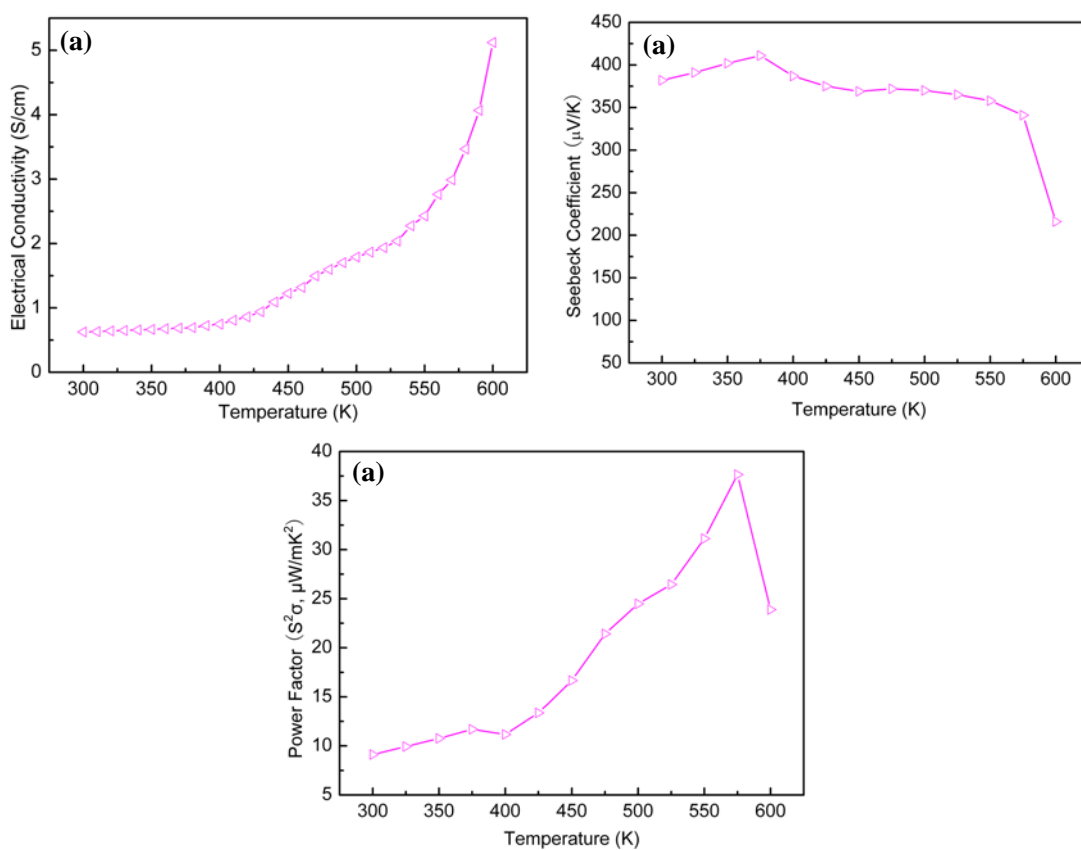

Fig. S2 Thermoelectric transport property as a function of temperature for the mixed PbS nanorods and PbTe nanoparticles with the molar ratio of 20.
